# Supplementary material for: Comparison of 4-Year Health Care Expenditures Associated With Roux-en-Y Gastric Bypass vs Sleeve Gastrectomy
Source: PubMed Central journal article supplement (PMC8430456; doi:10.1001/jamanetworkopen.2021.22079), 2021-09-09
Supplement: jamanetwopen-e2122079-s001.pdf [file jamanetwopen-e2122079-s001.pdf]

## Supplementary Online Content

Tarride JE, Doumouras AG, Hong D, et al. Comparison of 4-year health care expenditures associated with Roux-en-Y gastric bypass vs sleeve gastrectomy. *JAMA Netw Open*. 2021;4(9):e2122079. doi:10.1001/jamanetworkopen.2021.22079

**eTable 1.** Eligible Population

**eTable 2.** Comparisons of Unmatched vs Matched Sleeve Gastrectomy

**eTable 3.** Comparison of Unmatched vs Matched RYGB

This supplementary material has been provided by the authors to give readers additional information about their work.

**eTable 1. Eligible Population**

|                           | <b>RYGB (N=6,301)</b> | <b>Sleeve (N=926)</b> | <b>Standardized Mean Difference</b> |
|---------------------------|-----------------------|-----------------------|-------------------------------------|
| <b>Age</b>                |                       |                       |                                     |
| Mean (SD)                 | 45.08 ± 10.27         | 48.36 ± 10.58         | 0.31                                |
| <45                       | 3,047 (48.4%)         | 334 (36.1%)           | 0.25                                |
| 45-54                     | 1,993 (31.6%)         | 306 (33.0%)           | 0.03                                |
| 55-64                     | 1,149 (18.2%)         | 244 (26.3%)           | 0.20                                |
| 65+                       | 112 (1.8%)            | 42 (4.5%)             | 0.16                                |
| <b>Sex</b>                |                       |                       |                                     |
| Female                    | 5,246 (83.3%)         | 692 (74.7%)           | 0.21                                |
| Male                      | 1,055 (16.7%)         | 234 (25.3%)           | 0.21                                |
| <b>Body Mass Index</b>    |                       |                       |                                     |
| Mean (SD)                 | 47.65 (6.93)          | 53.17 (9.67)          | 0.66                                |
| <b>Year of Index date</b> |                       |                       |                                     |
| 2010                      | 93 (1.5%)             | 9 (1.0%)              | 0.05                                |
| 2011                      | 645 (10.2%)           | 101 (10.9%)           | 0.02                                |
| 2012                      | 1,658 (26.3%)         | 159 (17.2%)           | 0.22                                |
| 2013                      | 2,058 (32.7%)         | 313 (33.8%)           | 0.02                                |
| 2014                      | 1,529 (24.3%)         | 297 (32.1%)           | 0.17                                |
| 2015                      | 318 (5.0%)            | 47 (5.1%)             | 0.00                                |
| <b>Income Quintile</b>    |                       |                       |                                     |
| Lowest                    | 1,407 (22.3%)         | 226 (24.4%)           | 0.05                                |
| 2                         | 1,455 (23.1%)         | 221 (23.9%)           | 0.02                                |
| 3                         | 1,309 (20.8%)         | 189 (20.4%)           | 0.01                                |
| 4                         | 1,228 (19.5%)         | 165 (17.8%)           | 0.04                                |
| Highest                   | 885 (14.0%)           | 121 (13.1%)           | 0.03                                |
| Missing                   | 17 (0.3%)             | <=5                   | 0.03                                |

| <b>Marginalization Index (summary score)</b>                            |                     |                     |      |
|-------------------------------------------------------------------------|---------------------|---------------------|------|
| Mean (SD)                                                               | 3.00 (0.75)         | 3.08 (0.73)         | 0.10 |
| <b>Total number of major Johns Hopkins Aggregated Diagnostic Groups</b> |                     |                     |      |
| Mean (SD)                                                               | 5.96 (2.68)         | 6.93 (2.93)         | 0.35 |
| <b>Select medical conditions in preceding 5 years</b>                   |                     |                     |      |
| CRD / ESRD                                                              | 113 (1.8%)          | 49 (5.3%)           | 0.19 |
| CAD / PCI / CABS                                                        | 826 (13.1%)         | 224 (24.2%)         | 0.29 |
| Diabetes                                                                | 2,129 (33.8%)       | 366 (39.5%)         | 0.12 |
| Hypertension                                                            | 2,765 (43.9%)       | 490 (52.9%)         | 0.18 |
| Hypercholesterolemia                                                    | 1,096 (17.4%)       | 146 (15.8%)         | 0.04 |
| Mood and Anxiety Disorders Hospitalizations                             | 92 (1.5%)           | 18 (1.9%)           | 0.04 |
| <b>Healthcare expenditure in preceding 5 years (total)</b>              |                     |                     |      |
| Mean (SD)                                                               | \$15,897 (\$19,521) | \$26,792 (\$35,837) | 0.38 |
| <b>Healthcare utilization in preceding year</b>                         |                     |                     |      |
| Mean (SD) number of days in hospital one-year prior index               | 0.24 (1.59)         | 0.64 (3.05)         | 0.17 |
| Mean (SD) number of days in ED one-year prior index                     | 0.68 (1.43)         | 0.92 (1.86)         | 0.15 |

Abbreviations: RYGB: Roux-en-Y-Bypass; SG: sleeve gastrectomy; SD: standard deviations; CRD: chronic renal disease; ESRD: end stage renal disease; CAD: coronary artery disease; PCI: percutaneous coronary intervention; CABS: coronary artery bypass surgery; N.A.: not applicable

**eTable 2. Comparison of Unmatched vs Matched Sleeve Gastrectomy**

|                           | <b>Unmatched Sleeve<br/>(N=114)</b> | <b>Matched Sleeve<br/>(N=812)</b> | <b>Standardized Mean<br/>Difference</b> |
|---------------------------|-------------------------------------|-----------------------------------|-----------------------------------------|
| <b>Age</b>                |                                     |                                   |                                         |
| Mean (SD)                 | 50.41 (10.26)                       | 48.07 (10.60)                     | 0.22                                    |
| <45                       | 32 (28.1%)                          | 302 (37.2%)                       | 0.20                                    |
| 45-54                     | 37 (32.5%)                          | 269 (33.1%)                       | 0.01                                    |
| 55-64                     | 38 (33.3%)                          | 206 (25.4%)                       | 0.18                                    |
| 65+                       | 7 (6.1%)                            | 35 (4.3%)                         | 0.08                                    |
| <b>Sex</b>                |                                     |                                   |                                         |
| Female                    | 71 (62.3%)                          | 621 (76.5%)                       | 0.31                                    |
| Male                      | 43 (37.7%)                          | 191 (23.5%)                       | 0.31                                    |
| <b>Body Mass Index</b>    |                                     |                                   |                                         |
| Mean (SD)                 | 62.36 (9.77)                        | 51.88 (8.93)                      | 1.12                                    |
| <b>Year of Index date</b> |                                     |                                   |                                         |
| 2010                      | 0 (0.0%)                            | 9 (1.1%)                          | 0.15                                    |
| 2011                      | 13 (11.4%)                          | 88 (10.8%)                        | 0.02                                    |
| 2012                      | 11 (9.6%)                           | 148 (18.2%)                       | 0.25                                    |
| 2013                      | 37 (32.5%)                          | 276 (34.0%)                       | 0.03                                    |
| 2014                      | 47 (41.2%)                          | 250 (30.8%)                       | 0.22                                    |
| 2015                      | 6 (5.3%)                            | 41 (5.0%)                         | 0.01                                    |
| <b>Income Quintile</b>    |                                     |                                   |                                         |
| Lowest                    | 32 (28.1%)                          | 194 (23.9%)                       | 0.10                                    |
| 2                         | 30 (26.3%)                          | 191 (23.5%)                       | 0.06                                    |
| 3                         | 20 (17.5%)                          | 169 (20.8%)                       | 0.08                                    |
| 4                         | 16 (14.0%)                          | 149 (18.3%)                       | 0.12                                    |
| Highest                   | 12 (10.5%)                          | 109 (13.4%)                       | 0.09                                    |

|                                                                         |                     |                     |      |
|-------------------------------------------------------------------------|---------------------|---------------------|------|
| Missing                                                                 | <=5                 | 0 (0.0%)            | 0.27 |
| <b>Marginalization Index (summary score)</b>                            |                     |                     |      |
| Mean (SD)                                                               | 3.15 (0.65)         | 3.07 (0.74)         | 0.12 |
| <b>Total number of major Johns Hopkins Aggregated Diagnostic Groups</b> |                     |                     |      |
| Mean (SD)                                                               | 7.87 (3.20)         | 6.80 (2.87)         | 0.35 |
| <b>Select medical conditions in preceding 5 years</b>                   |                     |                     |      |
| CRD / ESRD                                                              | 19 (16.7%)          | 30 (3.7%)           | 0.44 |
| CAD / PCI / CABS                                                        | 58 (50.9%)          | 166 (20.4%)         | 0.67 |
| Diabetes                                                                | 56 (49.1%)          | 310 (38.2%)         | 0.22 |
| Hypertension                                                            | 77 (67.5%)          | 413 (50.9%)         | 0.34 |
| Hypercholesterolemia                                                    | 13 (11.4%)          | 133 (16.4%)         | 0.14 |
| Mood and Anxiety Disorders<br>Hospitalizations                          | <=5                 | 15 (1.8%)           | 0.05 |
| <b>Healthcare expenditure in preceding 5 years (total)</b>              |                     |                     |      |
| Mean (SD)                                                               | \$50,760 (\$63,741) | \$23,428 (\$28,401) | 0.55 |
| <b>Healthcare utilization in preceding year</b>                         |                     |                     |      |
| Mean (SD) number of days in<br>hospital one-year prior index            | 1.69 (5.06)         | 0.50 (2.62)         | 0.30 |
| Mean (SD) number of days in<br>ED one-year prior index                  | 1.04 (1.82)         | 0.91 (1.86)         | 0.07 |

Abbreviations: RYGB: Roux-en-Y-Bypass; SG: sleeve gastrectomy; SD: standard deviations; CRD: chronic renal disease; ESRD: end stage renal disease; CAD: coronary artery disease; PCI: percutaneous coronary intervention; CABS: coronary artery bypass surgery

**eTable 3. Comparison of Unmatched vs Matched RYGB**

|                           | <b>Unmatched RYGB<br/>(N=5,489)</b> | <b>Matched RYGB (N=812)</b> | <b>Standardized Mean<br/>Difference</b> |
|---------------------------|-------------------------------------|-----------------------------|-----------------------------------------|
| <b>Age</b>                |                                     |                             |                                         |
| Mean (SD)                 | 44.66 (10.17)                       | 47.90 (10.56)               | 0.31                                    |
| <45                       | 2,741 (49.9%)                       | 306 (37.7%)                 | 0.25                                    |
| 45-54                     | 1,726 (31.4%)                       | 267 (32.9%)                 | 0.03                                    |
| 55-64                     | 942 (17.2%)                         | 207 (25.5%)                 | 0.20                                    |
| 65+                       | 80 (1.5%)                           | 32 (3.9%)                   | 0.15                                    |
| <b>Sex</b>                |                                     |                             |                                         |
| Female                    | 4,625 (84.3%)                       | 621 (76.5%)                 | 0.20                                    |
| Male                      | 864 (15.7%)                         | 191 (23.5%)                 | 0.20                                    |
| <b>Body Mass Index</b>    |                                     |                             |                                         |
| Mean (SD)                 | 47.02 (6.48)                        | 51.91 (8.28)                | 0.66                                    |
| <b>Year of Index date</b> |                                     |                             |                                         |
| 2010                      | 85 (1.5%)                           | 8 (1.0%)                    | 0.05                                    |
| 2011                      | 549 (10.0%)                         | 96 (11.8%)                  | 0.06                                    |
| 2012                      | 1,526 (27.8%)                       | 132 (16.3%)                 | 0.28                                    |
| 2013                      | 1,773 (32.3%)                       | 285 (35.1%)                 | 0.06                                    |
| 2014                      | 1,279 (23.3%)                       | 250 (30.8%)                 | 0.17                                    |
| 2015                      | 277 (5.0%)                          | 41 (5.0%)                   | 0                                       |
| <b>Income Quintile</b>    |                                     |                             |                                         |
| Lowest                    | 1,240 (22.6%)                       | 167 (20.6%)                 | 0.05                                    |
| 2                         | 1,244 (22.7%)                       | 211 (26.0%)                 | 0.08                                    |
| 3                         | 1,136 (20.7%)                       | 173 (21.3%)                 | 0.01                                    |
| 4                         | 1,082 (19.7%)                       | 146 (18.0%)                 | 0.04                                    |
| Highest                   | 770 (14.0%)                         | 115 (14.2%)                 | 0.00                                    |
| Missing                   | 17 (0.3%)                           | 0 (0.0%)                    | 0.08                                    |

| <b>Marginalization Index (summary score)</b>                            |                    |                   |      |
|-------------------------------------------------------------------------|--------------------|-------------------|------|
| Mean (SD)                                                               | 3.00 (0.75)        | 3.04 (0.74)       | 0.06 |
| <b>Total number of major Johns Hopkins Aggregated Diagnostic Groups</b> |                    |                   |      |
| Mean (SD)                                                               | 5.83 (2.62)        | 6.81 (2.88)       | 0.35 |
| <b>Select medical conditions in preceding 5 years</b>                   |                    |                   |      |
| CRD / ESRD                                                              | 87 (1.6%)          | 26 (3.2%)         | 0.11 |
| CAD / PCI / CABS                                                        | 670 (12.2%)        | 156 (19.2%)       | 0.19 |
| Diabetes                                                                | 1,819 (33.1%)      | 310 (38.2%)       | 0.11 |
| Hypertension                                                            | 2,353 (42.9%)      | 412 (50.7%)       | 0.16 |
| Hypercholesterolemia                                                    | 961 (17.5%)        | 135 (16.6%)       | 0.02 |
| Mood and Anxiety Disorders Hospitalizations                             | 85 (1.5%)          | 7 (0.9%)          | 0.06 |
| <b>Healthcare expenditure in preceding 5 years (total)</b>              |                    |                   |      |
| Mean (SD)                                                               | \$ 15,109 (17,835) | \$21,220 (27,841) | 0.26 |
| <b>Healthcare utilization in preceding year</b>                         |                    |                   |      |
| Mean (SD) number of days in hospital one-year prior index               | 0.21 (1.48)        | 0.48 (2.17)       | 0.15 |
| Mean (SD) number of days in ED one-year prior index                     | 0.64 (1.32)        | 0.91 (1.99)       | 0.16 |

Abbreviations: RYGB: Roux-en-Y-Bypass; SG: sleeve gastrectomy; SD: standard deviations; CRD: chronic renal disease; ESRD: end stage renal disease; CAD: coronary artery disease; PCI: percutaneous coronary intervention; CABS: coronary artery bypass surgery; N.A.: not applicable
